# Supplementary material
Source: PubMed Central journal article supplement (PMC9258747)

**Disclosure Purpose:** 22-02092

## Summary of Interests

| Company or Organization                                                                                                                                              |                  |                                                                                                                   |
|----------------------------------------------------------------------------------------------------------------------------------------------------------------------|------------------|-------------------------------------------------------------------------------------------------------------------|
| Entity                                                                                                                                                               | Type             | Interest Held By                                                                                                  |
| Massachusetts Consortium on Pathogen Readiness                                                                                                                       | Grant / Contract | Self                                                                                                              |
| <i>Recipient Name:</i> Amy Barczak<br><i>Grant / Contract Description:</i> Grant to fund characterization of SARS-CoV-2 variants as part of the POSITIVES consortium |                  | <i>Recipient Type:</i> Institution<br><i>Grant / Contract Purpose:</i> Research<br><i>Additional Information:</i> |

## Additional Questions:

- Are there other relationships or activities that readers could perceive to have influenced, or that give the appearance of potentially influencing, what you wrote in the submitted work?**  
No.
- What is the manuscript title?**  
Duration of Culturable Virus Shedding in SARS-CoV-2 Omicron (BA.1) Infection
- Are you the corresponding author?**  
Yes.
  - Please list the other authors' names here.**  
Julie Boucau, Ph.D. Caitlin Marino, B.S. James Regan, B.S. Rockib Uddin, B.S. Manish C. Choudhary, Ph.D. James P. Flynn, B.S. Geoffrey Chen, B.A. Ashley M. Stuckwisch, B.S. Josh Mathews, A.B. May Y. Liew, B.A. Arshdeep Singh, B.S. Taryn Lipiner, M.P.H. Autumn Kittilson, B.S. Meghan Melberg, B.S. Yijia Li, M.D. Rebecca F. Gilbert, B.A. Zahra Reynolds, M.P.H. Surabhi L. Iyer, B.A. Grace C. Chamberlin, B.A. Tammy D. Vyas, B.S. Marcia B. Goldberg, M.D. Jatin M. Vyas, M.D., Ph.D. Jonathan Z. Li, M.D. Jacob E. Lemieux, M.D., D. Phil. Mark J. Siedner, M.D., M.P.H.

## Certification

I certify that the information provided in this disclosure is complete and accurate.

**Disclosure Purpose:** 22-02092

Summary of Interests

I do not have any interests to disclose at this time.

Additional Questions:

- 1. **Are there other relationships or activities that readers could perceive to have influenced, or that give the appearance of potentially influencing, what you wrote in the submitted work?**  
No.
- 2. **What is the manuscript title?**  
Duration of Culturable Virus Shedding in SARS-CoV-2 Omicron (BA.1) Infection
- 3. **Are you the corresponding author?**  
No.

Certification

I certify that the information provided in this disclosure is complete and accurate.

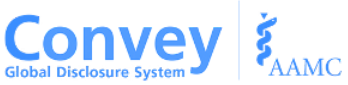

**Disclosure Purpose:** 22-02092

## Summary of Interests

I do not have any interests to disclose at this time.

## Additional Questions:

- Are there other relationships or activities that readers could perceive to have influenced, or that give the appearance of potentially influencing, what you wrote in the submitted work?**  
No.
- What is the manuscript title?**  
Duration of Culturable Virus Shedding in SARS-CoV-2 Omicron (BA.1) Infection
- Are you the corresponding author?**  
No.

## Certification

I certify that the information provided in this disclosure is complete and accurate.

Disclosure Purpose: 22-02092

Summary of Interests

I do not have any interests to disclose at this time.

Additional Questions:

- 1. **Are there other relationships or activities that readers could perceive to have influenced, or that give the appearance of potentially influencing, what you wrote in the submitted work?**  
No.
- 2. **What is the manuscript title?**  
Characterization of virologic rebound following nirmatrelvir-ritonavir treatment for COVID-19
- 3. **Are you the corresponding author?**  
No.

Certification

I certify that the information provided in this disclosure is complete and accurate.

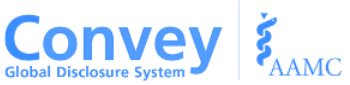

**Disclosure Purpose:** 22-02092

### Summary of Interests

I do not have any interests to disclose at this time.

### Additional Questions:

- Are there other relationships or activities that readers could perceive to have influenced, or that give the appearance of potentially influencing, what you wrote in the submitted work?**  
No.
- What is the manuscript title?**  
Duration of Culturable Virus Shedding in SARS-CoV-2 Omicron (BA.1) Infection
- Are you the corresponding author?**  
No.

### Certification

I certify that the information provided in this disclosure is complete and accurate.

**Disclosure Purpose:** 22-02092

**Summary of Interests**

I do not have any interests to disclose at this time.

**Additional Questions:**

- 1. **Are there other relationships or activities that readers could perceive to have influenced, or that give the appearance of potentially influencing, what you wrote in the submitted work?**  
No.
- 2. **What is the manuscript title?**  
Duration of Culturable Virus Shedding in SARS-CoV-2 Omicron (BA.1) Infection
- 3. **Are you the corresponding author?**  
No.

**Certification**

I certify that the information provided in this disclosure is complete and accurate.

Disclosure Purpose: 22-02092

Summary of Interests

I do not have any interests to disclose at this time.

Additional Questions:

- 1. **Are there other relationships or activities that readers could perceive to have influenced, or that give the appearance of potentially influencing, what you wrote in the submitted work?**  
No.
- 2. **What is the manuscript title?**  
Duration of Culturable Virus Shedding in SARS-CoV-2 Omicron (BA.1) Infection
- 3. **Are you the corresponding author?**  
No.

Certification

I certify that the information provided in this disclosure is complete and accurate.



**Disclosure Purpose:** 22-02092

## Summary of Interests

| Company or Organization                                                                                                         |                  |                                                                                |
|---------------------------------------------------------------------------------------------------------------------------------|------------------|--------------------------------------------------------------------------------|
| Entity                                                                                                                          | Type             | Interest Held By                                                               |
| <a href="#">Massachusetts Consortium of Pathogen Readiness (MassCPR)</a>                                                        | Grant / Contract | Self                                                                           |
| <i>Recipient Name:</i> Marcia Goldberg<br><i>Grant / Contract Description:</i> Research grant<br><i>Additional Information:</i> |                  | <i>Recipient Type:</i> Individual<br><i>Grant / Contract Purpose:</i> Research |

## Additional Questions:

- Are there other relationships or activities that readers could perceive to have influenced, or that give the appearance of potentially influencing, what you wrote in the submitted work?**  
No.
- What is the manuscript title?**  
Duration of Culturable Virus Shedding in SARS-CoV-2 Omicron (BA.1) Infection
- Are you the corresponding author?**  
No.

## Certification

I certify that the information provided in this disclosure is complete and accurate.



**Disclosure Purpose:** 22-02092

**Summary of Interests**

I do not have any interests to disclose at this time.

**Additional Questions:**

- 1. **Are there other relationships or activities that readers could perceive to have influenced, or that give the appearance of potentially influencing, what you wrote in the submitted work?**  
No.
- 2. **What is the manuscript title?**  
Duration of Culturable Virus Shedding in SARS-CoV-2 Omicron (BA.1) Infection
- 3. **Are you the corresponding author?**  
No.

**Certification**

I certify that the information provided in this disclosure is complete and accurate.

Disclosure Purpose: 22-02092

Summary of Interests

I do not have any interests to disclose at this time.

Additional Questions:

- 1. **Are there other relationships or activities that readers could perceive to have influenced, or that give the appearance of potentially influencing, what you wrote in the submitted work?**  
No.
- 2. **What is the manuscript title?**  
Duration of Culturable Virus Shedding in SARS-CoV-2 Omicron (BA.1) Infection
- 3. **Are you the corresponding author?**  
No.

Certification

I certify that the information provided in this disclosure is complete and accurate.

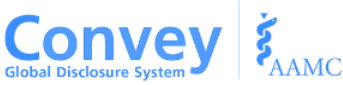

**Disclosure Purpose:** 22-02092

## Summary of Interests

| Company or Organization                                                                                                                                            |                  |                                                                                |
|--------------------------------------------------------------------------------------------------------------------------------------------------------------------|------------------|--------------------------------------------------------------------------------|
| Entity                                                                                                                                                             | Type             | Interest Held By                                                               |
| <a href="#">Massachusetts Consortium for pathogen readiness</a>                                                                                                    | Grant / Contract | Self                                                                           |
| <i>Recipient Name:</i> Jacob E. Lemieux<br><i>Grant / Contract Description:</i> Grant to characterize SARS-CoV-2 viral variants.<br><i>Additional Information:</i> |                  | <i>Recipient Type:</i> Individual<br><i>Grant / Contract Purpose:</i> Research |

## Additional Questions:

- Are there other relationships or activities that readers could perceive to have influenced, or that give the appearance of potentially influencing, what you wrote in the submitted work?**  
No.
- What is the manuscript title?**  
Duration of Culturable Virus Shedding in SARS-CoV-2 Omicron (BA.1) Infection
- Are you the corresponding author?**  
No.

## Certification

I certify that the information provided in this disclosure is complete and accurate.

Disclosure Purpose: 22-02092

Summary of Interests

**Company or Organization**

| Entity                                                                                                       | Type             | Interest Held By                                                                |
|--------------------------------------------------------------------------------------------------------------|------------------|---------------------------------------------------------------------------------|
| <a href="#">Massachusetts Consortium for Pathogen Readiness</a>                                              | Grant / Contract | Self                                                                            |
| <i>Recipient Name:</i> Jonathan Li<br><i>Grant / Contract Description:</i><br><i>Additional Information:</i> |                  | <i>Recipient Type:</i> Institution<br><i>Grant / Contract Purpose:</i> Research |

Additional Questions:

- Are there other relationships or activities that readers could perceive to have influenced, or that give the appearance of potentially influencing, what you wrote in the submitted work?**  
No.
- What is the manuscript title?**  
Duration of Culturable Virus Shedding in SARS-CoV-2 Omicron (BA.1) Infection
- Are you the corresponding author?**  
No.

Certification

I certify that the information provided in this disclosure is complete and accurate.

**Disclosure Purpose:** 22-02092

## Summary of Interests

I do not have any interests to disclose at this time.

## Additional Questions:

1. **Are there other relationships or activities that readers could perceive to have influenced, or that give the appearance of potentially influencing, what you wrote in the submitted work?**  
No.
2. **What is the manuscript title?**  
Duration of Culturable Virus Shedding in SARS-CoV-2 Omicron (BA.1) Infection
3. **Are you the corresponding author?**  
No.

## Certification

I certify that the information provided in this disclosure is complete and accurate.

**Disclosure Purpose:** 22-02092

## Summary of Interests

I do not have any interests to disclose at this time.

## Additional Questions:

1. **Are there other relationships or activities that readers could perceive to have influenced, or that give the appearance of potentially influencing, what you wrote in the submitted work?**  
No.
2. **What is the manuscript title?**  
Duration of Culturable Virus Shedding in SARS-CoV-2 Omicron (BA.1) Infection
3. **Are you the corresponding author?**  
No.

## Certification

I certify that the information provided in this disclosure is complete and accurate.

**Disclosure Purpose:** 22-02092

## Summary of Interests

I do not have any interests to disclose at this time.

## Additional Questions:

- Are there other relationships or activities that readers could perceive to have influenced, or that give the appearance of potentially influencing, what you wrote in the submitted work?**  
No.
- What is the manuscript title?**  
Duration of Culturable Virus Shedding in SARS-CoV-2 Omicron (BA.1) Infection
- Are you the corresponding author?**  
No.

## Certification

I certify that the information provided in this disclosure is complete and accurate.

**Disclosure Purpose:** 22-02092

**Summary of Interests**

I do not have any interests to disclose at this time.

**Additional Questions:**

- 1. **Are there other relationships or activities that readers could perceive to have influenced, or that give the appearance of potentially influencing, what you wrote in the submitted work?**  
No.
- 2. **What is the manuscript title?**  
Duration of Culturable Virus Shedding in SARS-CoV-2 Omicron (BA.1) Infection
- 3. **Are you the corresponding author?**  
No.

**Certification**

I certify that the information provided in this disclosure is complete and accurate.





**Disclosure Purpose:** 22-02092

## Summary of Interests

I do not have any interests to disclose at this time.

## Additional Questions:

- Are there other relationships or activities that readers could perceive to have influenced, or that give the appearance of potentially influencing, what you wrote in the submitted work?**  
No.
- What is the manuscript title?**  
Duration of Culturable Virus Shedding in SARS-CoV-2 Omicron (BA.1) Infection
- Are you the corresponding author?**  
No.

## Certification

I certify that the information provided in this disclosure is complete and accurate.

**Disclosure Purpose:** 22-02092

### Summary of Interests

I do not have any interests to disclose at this time.

### Additional Questions:

- Are there other relationships or activities that readers could perceive to have influenced, or that give the appearance of potentially influencing, what you wrote in the submitted work?**  
No.
- What is the manuscript title?**  
Duration of culturable virus shedding in SARS-CoV-2 Omicron (BA.1) infection
- Are you the corresponding author?**  
No.

### Certification

I certify that the information provided in this disclosure is complete and accurate.

**Disclosure Purpose:** 22-02092

Summary of Interests

I do not have any interests to disclose at this time.

Additional Questions:

- 1. **Are there other relationships or activities that readers could perceive to have influenced, or that give the appearance of potentially influencing, what you wrote in the submitted work?**  
No.
- 2. **What is the manuscript title?**  
Duration of Culturable Virus Shedding in SARS-CoV-2 Omicron (BA.1) Infection
- 3. **Are you the corresponding author?**  
No.

Certification

I certify that the information provided in this disclosure is complete and accurate.



**Disclosure Purpose:** 22-02092

### Summary of Interests

I do not have any interests to disclose at this time.

### Additional Questions:

- Are there other relationships or activities that readers could perceive to have influenced, or that give the appearance of potentially influencing, what you wrote in the submitted work?**  
No.
- What is the manuscript title?**  
Duration of Culturable Virus Shedding in SARS-CoV-2 Omicron (BA.1) Infection
- Are you the corresponding author?**  
No.

### Certification

I certify that the information provided in this disclosure is complete and accurate.

Disclosure Purpose: 22-02092

## Summary of Interests

### Company or Organization

| Entity                                                                                                                          | Type                                                                            | Interest Held By |
|---------------------------------------------------------------------------------------------------------------------------------|---------------------------------------------------------------------------------|------------------|
| <a href="#">Massachusetts Consortium on Pathogen Readiness</a>                                                                  | Grant / Contract                                                                | Self             |
| <i>Recipient Name:</i> Massachusetts General Hospital<br><i>Grant / Contract Description:</i><br><i>Additional Information:</i> | <i>Recipient Type:</i> Institution<br><i>Grant / Contract Purpose:</i> Research |                  |

## Additional Questions:

- Are there other relationships or activities that readers could perceive to have influenced, or that give the appearance of potentially influencing, what you wrote in the submitted work?**  
No.
- What is the manuscript title?**  
Duration of Culturable Virus Shedding in SARS-CoV-2 Omicron (BA.1) Infection
- Are you the corresponding author?**  
No.

## Certification

I certify that the information provided in this disclosure is complete and accurate.

**Disclosure Purpose:** 22-02092

### Summary of Interests

I do not have any interests to disclose at this time.

### Additional Questions:

- Are there other relationships or activities that readers could perceive to have influenced, or that give the appearance of potentially influencing, what you wrote in the submitted work?**  
No.
- What is the manuscript title?**  
Duration of Culturable Virus Shedding in SARS-CoV-2 Omicron (BA.1) Infection
- Are you the corresponding author?**  
No.

### Certification

I certify that the information provided in this disclosure is complete and accurate.

**Disclosure Purpose:** 22-02092

### Summary of Interests

I do not have any interests to disclose at this time.

### Additional Questions:

- Are there other relationships or activities that readers could perceive to have influenced, or that give the appearance of potentially influencing, what you wrote in the submitted work?**  
No.
- What is the manuscript title?**  
Duration of Culturable Virus Shedding in SARS-CoV-2 Omicron (BA.1) Infection
- Are you the corresponding author?**  
No.

### Certification

I certify that the information provided in this disclosure is complete and accurate.

**Disclosure Purpose:** 22-02092

**Summary of Interests**

I do not have any interests to disclose at this time.

**Additional Questions:**

- 1. **Are there other relationships or activities that readers could perceive to have influenced, or that give the appearance of potentially influencing, what you wrote in the submitted work?**  
No.
- 2. **What is the manuscript title?**  
Duration of Culturable Virus Shedding in SARS-CoV-2 Omicron (BA.1) Infection
- 3. **Are you the corresponding author?**  
No.

**Certification**

I certify that the information provided in this disclosure is complete and accurate.





Disclosure Purpose: 22-02092

Summary of Interests

**Company or Organization**

| Entity                                                                                                                                                        | Type             | Interest Held By                                                               |
|---------------------------------------------------------------------------------------------------------------------------------------------------------------|------------------|--------------------------------------------------------------------------------|
| <a href="#">Massachusetts General Hospital</a>                                                                                                                | Grant / Contract | Self                                                                           |
| <i>Recipient Name:</i> Jatin M. Vyas, MD, PhD<br><i>Grant / Contract Description:</i> Department of Medicine COVID-19 grant<br><i>Additional Information:</i> |                  | <i>Recipient Type:</i> Individual<br><i>Grant / Contract Purpose:</i> Research |

Additional Questions:

- Are there other relationships or activities that readers could perceive to have influenced, or that give the appearance of potentially influencing, what you wrote in the submitted work?**  
No.
- What is the manuscript title?**  
Duration of Culturable Virus Shedding in SARS-CoV-2 Omicron (BA.1) Infection
- Are you the corresponding author?**  
No.

Certification

I certify that the information provided in this disclosure is complete and accurate.

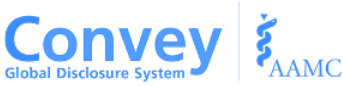

**Disclosure Purpose:** 22-02092

**Summary of Interests**

I do not have any interests to disclose at this time.

**Additional Questions:**

- 1. **Are there other relationships or activities that readers could perceive to have influenced, or that give the appearance of potentially influencing, what you wrote in the submitted work?**  
No.
- 2. **What is the manuscript title?**  
Duration of Culturable Virus Shedding in SARS-CoV-2 Omicron (BA.1) Infection
- 3. **Are you the corresponding author?**  
No.

**Certification**

I certify that the information provided in this disclosure is complete and accurate.



Supplement: NEJMc2202092_disclosures.pdf [file NEJMc2202092_disclosures.pdf]
