# Supplementary material
Source: PubMed Central journal article supplement (PMC9258747)
Supplement: NEJMc2202092_appendix.pdf [file NEJMc2202092_appendix.pdf]

## Supplementary Appendix

Supplement to: Boucau J, Marino C, Regan J, et al. Duration of shedding of culturable virus in SARS-CoV-2 omicron (BA.1) infection. *N Engl J Med*. DOI: 10.1056/NEJMc2202092

This appendix has been provided by the authors to give readers additional information about the work.

|    |                               |     |
|----|-------------------------------|-----|
| 1  | <b>Table of Contents</b>      |     |
| 2  |                               |     |
| 3  |                               |     |
| 4  | Supplementary Methods.....    | 2-6 |
| 5  |                               |     |
| 6  | Acknowledgements.....         | 6   |
| 7  |                               |     |
| 8  | Author Contributions.....     | 6-7 |
| 9  |                               |     |
| 10 | Supplementary Figure S1.....  | 8   |
| 11 |                               |     |
| 12 | Supplementary Figure S2.....  | 9   |
| 13 |                               |     |
| 14 | Supplementary Figure S3.....  | 10  |
| 15 |                               |     |
| 16 | Supplementary Figure S4.....  | 11  |
| 17 |                               |     |
| 18 | Supplementary Table S1.....   | 12  |
| 19 |                               |     |
| 20 | Supplementary Table S2.....   | 13  |
| 21 |                               |     |
| 22 | Supplementary Table S3.....   | 14  |
| 23 |                               |     |
| 24 | Supplementary Table S4.....   | 15  |
| 25 |                               |     |
| 26 | Supplementary Table S5.....   | 16  |
| 27 |                               |     |
| 28 | Supplementary References..... | 17  |
| 29 |                               |     |

30 **Methods**

31 *Study Participants*

32 Non-hospitalized individuals with positive SARS-CoV-2 PCR tests in the Mass General Brigham  
33 medical system were recruited (Supplementary Figure S4). Adults over 18 years of age with a  
34 positive test within the previous four days in the medical health record were recruited,  
35 irrespective of indication for testing (i.e. for symptomatic disease, contact tracing, or work or pre-  
36 operative screening). The study team extracted an automated list of positive COVID-19 tests  
37 from the electronic medical record. The list was restricted to individuals residing in the study  
38 catchment area- a 40-mile radius around the hospital established by the need to conduct home-  
39 based specimen collection. At the start of each week, patients with positive results were  
40 stratified by vaccination status and ranked by recency of positive result with the goal of  
41 recruiting 2-3 new participants per week, which was the maximum capacity of the team to  
42 conduct ambulatory specimen collection. For those who consented to participation, we  
43 conducted home visits three times weekly for two weeks or until negative PCR testing. At each  
44 visit, we obtained self-collected nasal swabs in viral transport media, which were transported to  
45 the laboratory within four hours of collection, aliquoted and frozen at -80°C until future testing.  
46 Symptoms, date of onset, and severity were recorded at each specimen collection.  
47 Symptomatic infections were defined as those with COVID-19-related symptoms at any point  
48 during the observation period. Individuals treated with monoclonal antibodies were excluded  
49 from this analysis, based on data demonstrating that they impact the rate of culture conversion<sup>1</sup>.

50

51 *Viral load Quantification*

52 Viral load quantification was carried out as previously reported<sup>2</sup>. Briefly, nasal swab fluids were  
53 centrifuged at 21,000 x g for 2 hours at 4°C to pellet virions. 750 µL TRIZOL-LS™ Reagent  
54 (ThermoFisher) was then added to the pellets, and samples were subsequently incubated on  
55 ice for 10 minutes. 200 µL of chloroform (MilliporeSigma) was added to each sample, and the

56 resulting mixtures were then vortexed and centrifuged at 21,000 x g for 15 minutes at 4°C. The  
57 clear aqueous layer was collected and combined with an equal volume of isopropanol (Sigma),  
58 1.5 µL GlycoBlue™ Coprecipitant (ThermoFisher) and 100 µL 3M Sodium Acetate (Life  
59 Technologies); the resulting mixtures were briefly shaken and then incubated on dry ice.  
60 Samples were centrifuged at 21,000 x g for 45 minutes at 4°C to yield RNA pellets, which were  
61 washed with cold 70% ethanol before being resuspended in 50 µL DEPC-treated water  
62 (ThermoFisher). Using the US CDC 2019-nCoV\_N1 primer and probe set (IDT)  
63 (<https://www.cdc.gov/coronavirus/2019-ncov/lab/rt-pcr-panel-primer-probes.html>) and N1 qPCR  
64 standards in 16-fold dilutions to generate standard curves, SARS-CoV-2 viral RNA was  
65 quantified. Each reaction consisted of extracted RNA, 1X TaqPath™ 1-Step RT-qPCR Master  
66 Mix, CG (ThermoFisher), forward and reverse primers, and the probe. Each sample was run in  
67 triplicate, and all plates contained two non-template control (NTC) wells. Positive and negative  
68 controls were run alongside all samples. To ensure appropriate sample quality, the Importin-8  
69 (IPO8) housekeeping gene RNA level was quantified. The efficiency of the RNA extraction and  
70 qPCR amplification was assessed by quantifying the internal virion control RCAS<sup>3</sup> RNA level  
71 after spiking this viral mixture into each sample.

72

### 73 *SARS-CoV-2 culture*

74 Viral culture was performed in the BSL3 laboratory of the Ragon Institute of MGH, MIT, and  
75 Harvard as previously reported <sup>2</sup>. Briefly, Vero-E6 cells (American Type Culture Collection)  
76 maintained in DMEM (Corning) supplemented with HEPES (Corning), 1X Penicillin  
77 100IU/mL/Streptomycin 100 ug/mL (Corning), 1X Glutamine (Glutamax, ThermoFisher  
78 Scientific), and 10% Fetal Bovine serum (FBS) (Sigma) using Trypsin-EDTA (Fisher Scientific)  
79 were detached and seeded at 20,000 cells per well in 96w plates 16-20 hours before infection.  
80 Specimens were thawed on ice and filtered through a Spin-X 0.45µm filter (Corning) at 10,000 x  
81 g for 5min. 25ul of the undiluted filtrate was added to four wells of a 96w plate and serial diluted

82 (1:5) across half of the plate in media containing 5ug/mL of polybrene (Santa Cruz  
83 Biotechnology). Plates were centrifuged for 1 hour at 2000 x g at 37C. The positive control  
84 SARS-CoV-2 isolate USA-WA1/2020 strain (BEI Resources) was used in parallel for all assays.  
85 Plates were observed with a light microscope 7 days post-infection and documented wells with  
86 CPE. Supernatant of wells was harvested for RNA isolation using a QIAamp Viral RNA Mini kit  
87 (QIAGEN) for confirmation of the viral sequence. For each variant, we selected four specimens  
88 with viral loads between 5.2log and 6.5log, two with positive culture and two with negative  
89 culture results and repeated the TCID50 protocol using Vero-E6 and A549-Ace2 (BEI  
90 Resources) cell lines. In addition to the spinfection protocol described above, we included a set  
91 of plates that were not centrifuged after addition of the filtered clinical specimens but were  
92 incubated at 37C and 5% CO2 instead. Plates were then scored for CPE daily on days 3-7 post-  
93 inoculation. CPE was only observed following the spinfection protocol, and the results of the  
94 initial TCID50 experiments were confirmed. For the specimens showing CPE, CPE was  
95 observed at similar or earlier timepoints in Vero-E6 cells than in A549-ACE2 cells, and TCID50  
96 on day 7 was similar between the two cell lines.

97

#### 98 *SARS-CoV-2 Whole Genome sequencing*

99 Whole genome sequencing was performed as previously described<sup>2</sup> following the Illumina  
100 COVIDSeq Test protocol. Libraries were constructed using the Illumina Nextera XT Library Prep  
101 Kit, then pooled and quantified using a Qubit High Sensitivity dsDNA kit (Invitrogen, Waltham,  
102 MA, USA). Genomic sequencing was performed on an Illumina NextSeq 2000, Illumina NextSeq  
103 550, or Illumina NovaSeq SP instrument. Sequences with an assembly length greater than  
104 24,000 base pairs were considered complete genomes, and those sequences were assigned a  
105 Pango lineage using the most up-to-date version of pangoLEARN assignment algorithm v2.4.2<sup>4</sup>.  
106 All sequences were deposited to GenBank and GISAID. The samples were submitted to NCBI  
107 with Bioproject Accession numbers PRJNA715749 or PRJNA759255.

108

109 *SARS-CoV-2 TaqPath RT-PCR Assay*

110 Starting with Participant 200, samples were tested for spike gene target failure (SGTF) as an  
111 additional genotyping method of detecting Omicron cases following the TaqPath COVID-19  
112 Combo Kit protocol (Thermo Fisher Scientific, Waltham, MA, USA). Nucleic acid was extracted  
113 using the MagMAX Viral/Pathogen II Nucleic Acid Isolation Kit on a Thermo KingFisher Flex  
114 purification system (Thermo Fisher Scientific, Waltham, MA, USA). Reverse transcription PCR  
115 (RT-PCR) was conducted on extracted samples using the Applied Biosystems 7500 Fast Dx  
116 Real-Time PCR Instrument (Applied Biosystems, Waltham, MA, USA), then analyzed for the  
117 presence of SARS-CoV-2 on ORF1ab, N gene, and S gene targets. SGTF was determined by  
118 amplification of SARS-CoV-2 for the ORF1ab and N gene targets with CT values <36 along with  
119 the lack of amplification for the S gene target.

120

121 *SARS-CoV-2 Spike gene amplification*

122 Spike gene amplification was also performed as previously described<sup>2</sup> to determine variant  
123 types for specimens with low viral load when whole genome sequencing was unsuccessful.  
124 cDNA synthesis was synthesized using Superscript IV reverse transcriptase (Invitrogen,  
125 Waltham, MA, USA) as per manufacturer's protocols. cDNA amplification was performed using  
126 *in-house* designed primer sets that targeted codon 1-814 of the spike gene. PCR products were  
127 pooled for Illumina library construction using the Nextera XT Library Prep Kit (Illumina, San  
128 Diego, CA, USA). Raw sequence data was analyzed with PASEq v1.4 (<https://www.paseq.org>).  
129 Amino acid variants were identified at the codon level with perl code and the resulting variant file  
130 was used to determine SARS-CoV-2 variant type using Nextclade version 1.13.1  
131 (<https://doi.org/10.21105/joss.03773>).

132

133 *Statistical methods*

134 We summarized demographic and clinical characteristics for individuals with delta and omicron  
135 variant infection and compared characteristics by sub-group with chi-squared testing for  
136 categorical variables and non-parametric testing for continuous variables. We graphically  
137 depicted viral decay by variant with a scatter plot and median of viral load over time since the  
138 index positive PCR test. To determine whether variant type or vaccination status was  
139 associated with virologic decay, we used the Kaplan-Meier method to estimate the survivor  
140 function for two outcomes of interest: 1) time to conversion to negative PCR and 2) time to  
141 conversion to viral culture negative. For both outcomes we conducted two survival analyses  
142 defining the origin of observation as either 1) the date of the first positive PCR test or 2) the  
143 earliest of the date of symptom onset or the first positive PCR test. We defined the exit as the  
144 first negative test (PCR or culture) after the last positive result. Individuals who had a positive  
145 PCR or culture on the final day of observation were censored as positive. For both outcomes,  
146 we constructed Kaplan-Meier curves of survival by variant and vaccination status. We  
147 categorized vaccination status as unvaccinated, vaccinated, for those who had received two  
148 COVID-19 vaccinations (or a single dose of the Johnson & Johnson/Janssen vaccine) at least  
149 14 days prior to enrollment, and boosted for those who had received three COVID-19  
150 vaccinations (or a second dose of the Johnson & Johnson/Janssen vaccine) at least 14 days  
151 prior to enrollment. We then fitted Cox proportional hazards models with both outcomes, and  
152 age, sex, vaccination status, and variant of infection as predictors.

153

#### 154 *Study approval*

155 Study procedures were approved by the Human Subjects Institutional Review Board and the  
156 Institutional Biosafety Committee at Mass General Brigham. All participants gave verbal  
157 informed consent, as written consent was waived by the review committee based on the risk to  
158 benefit ratio of requiring in-person interactions for an observational study of COVID-19.

159

160 **Acknowledgements**

161 The authors would like to thank study participants for willingness to engage in the study.

162

163 **Author Contributions**

164 J.B., M.G.B., J.M.V., J.Z.L, J.E.L, M.J.S, and A.K.B. designed the work. J.B., C.M., J.R., R.U.,

165 M.C.C., J.P.F., G.C., A.M.S., J.M., M.Y.L., A.S., T.L., A.K., M.M., Y.L., R.F.G., Z.R., S.L.I.,

166 G.C.C. and T.D.V. performed the work. J.B., J.R., R.U., M.C.C., J.P.F, Y.L., J.Z.L, J.E.L, M.J.S,

167 and A.K.B. analyzed and reported the work.

168



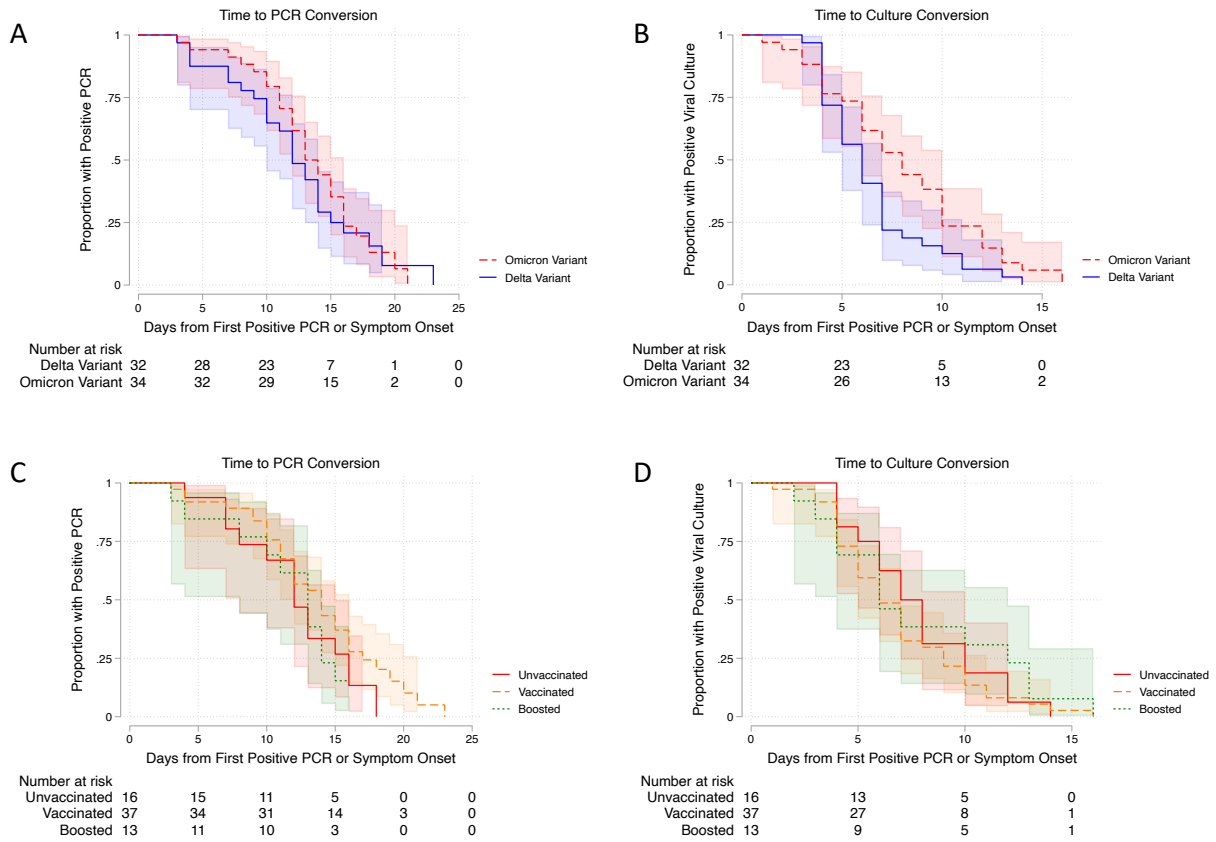

170  
171  
172  
173  
174  
175  
176  
177

**Supplementary Figure S1.** Kaplan-Meier survival curves demonstrating time from the earlier of symptom onset or initial positive PCR to negative PCR by viral variant (A) and vaccination status (C) and time from the earlier of symptom onset or initial positive PCR to negative viral culture by viral variant (B) and vaccination status (D). Shaded areas indicate 95% confidence intervals.

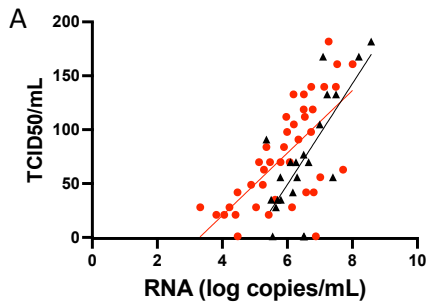

▲ delta  
● omicron

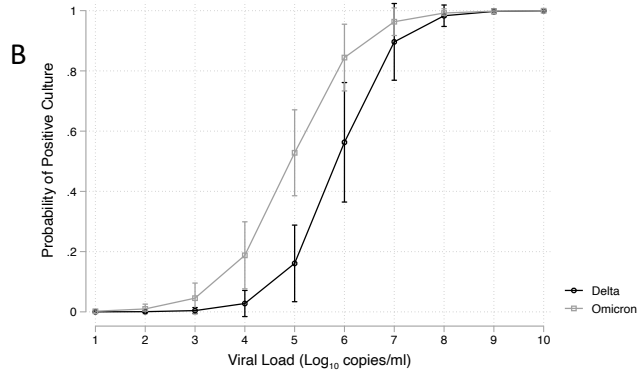

178  
179  
180  
181  
182  
183  
184  
185  
186

**Supplementary Figure S2.** A. Relationship between viral load and TCID50 for Omicron and Delta infections. Each point represents a nasal swab specimen collected from an individual with Delta (triangle) or Omicron (circle) variant infection. B. Predicted probability of a positive viral culture by viral load for delta (black line) and Omicron (gray line) infection. Curves were derived from post-regression margin from logistic regression model of viral load and variant on viral culture results.

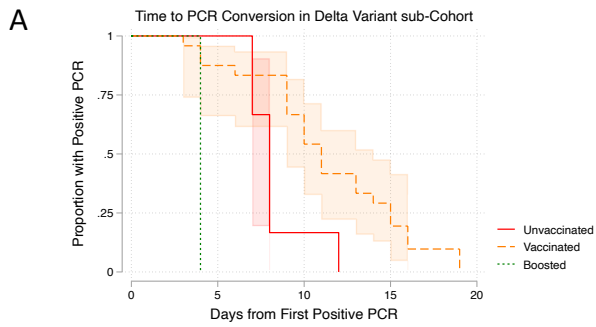

| Number at risk | 0  | 5  | 10 | 15 | 20 |
|----------------|----|----|----|----|----|
| Unvaccinated   | 7  | 6  | 1  | 0  | 0  |
| Vaccinated     | 24 | 21 | 16 | 3  | 0  |
| Boosted        | 1  | 0  | 0  | 0  | 0  |

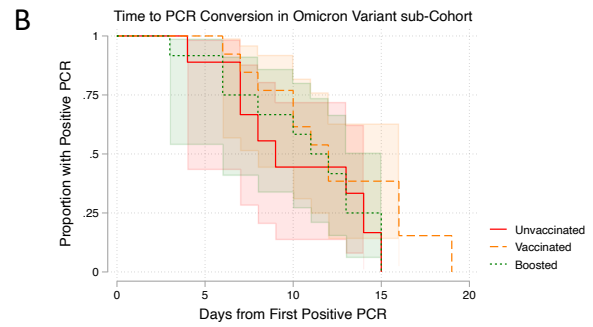

| Number at risk | 0  | 5  | 10 | 15 | 20 |
|----------------|----|----|----|----|----|
| Unvaccinated   | 9  | 8  | 4  | 1  | 0  |
| Vaccinated     | 13 | 13 | 10 | 5  | 0  |
| Boosted        | 12 | 11 | 8  | 1  | 0  |

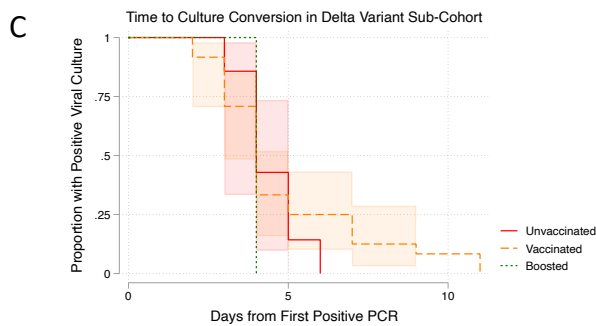

| Number at risk | 0  | 5 | 10 |
|----------------|----|---|----|
| Unvaccinated   | 7  | 3 | 0  |
| Vaccinated     | 24 | 8 | 2  |
| Boosted        | 1  | 0 | 0  |

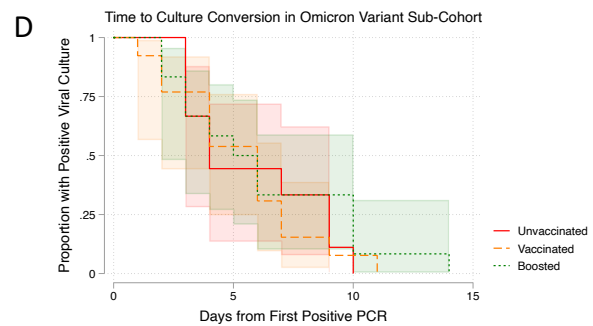

| Number at risk | 0  | 5 | 10 | 15 |
|----------------|----|---|----|----|
| Unvaccinated   | 9  | 4 | 1  | 0  |
| Vaccinated     | 13 | 7 | 1  | 0  |
| Boosted        | 12 | 7 | 4  | 0  |

187  
188  
189  
190  
191  
192  
193  
194

**Supplementary Figure S3.** (A-B) Kaplan-Meier survival curves demonstrating time from initial positive PCR to negative PCR by vaccination status for individuals with Delta variant infection (A) and Omicron variant infection (B). (C-D) Time from initial positive PCR to negative viral culture by vaccination status for Delta variant infection (C) and Omicron variant infection (D). Shaded areas indicate 95% confidence intervals.

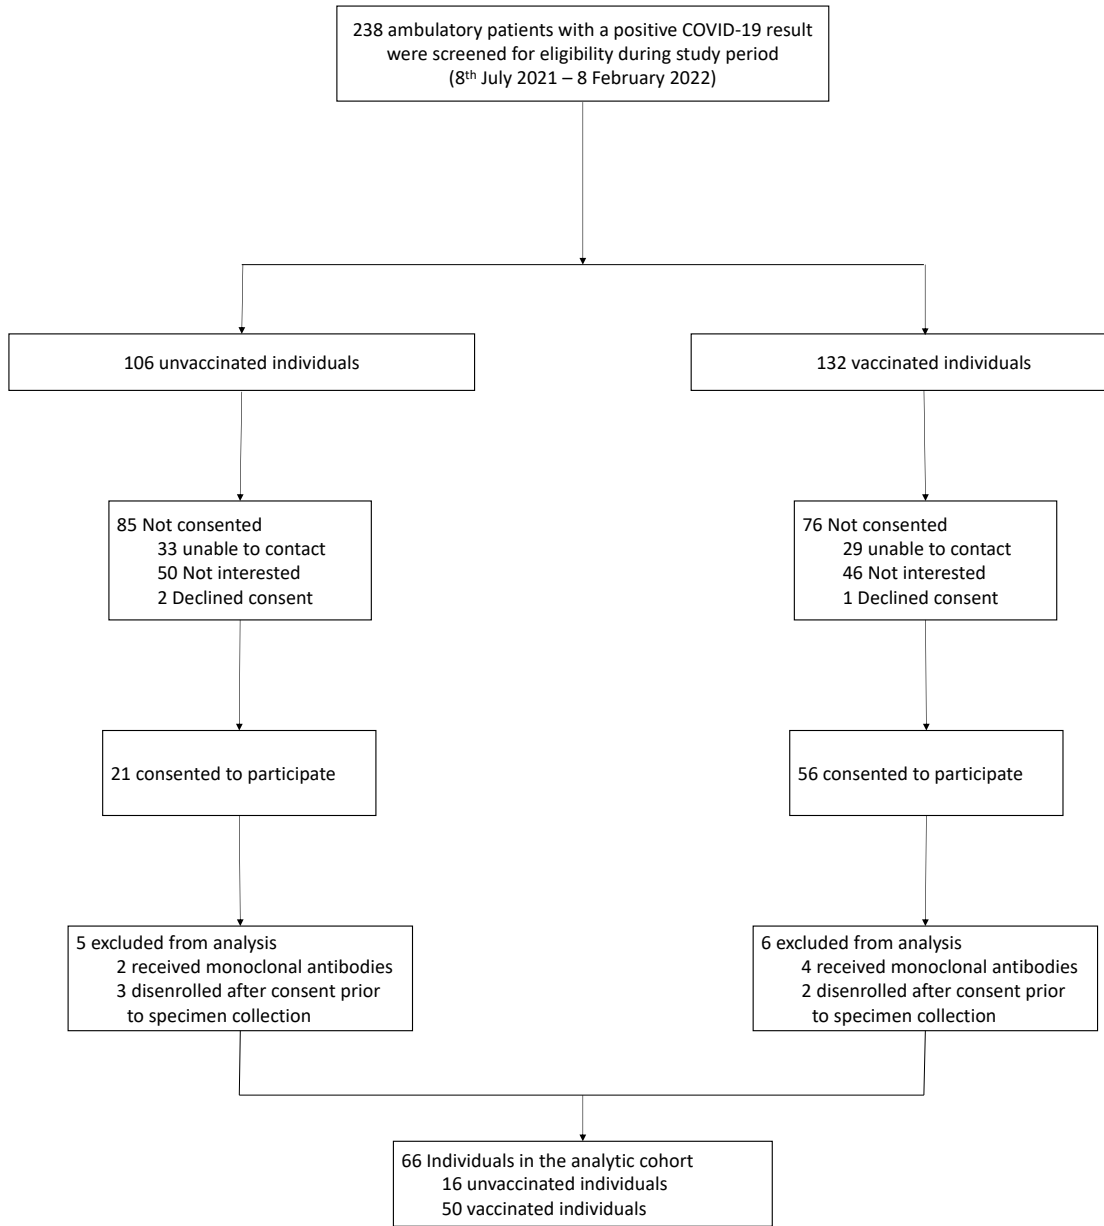

195  
196

**Supplementary Figure S4.** Schema of participant recruitment.

197 **Table S1.** Cohort characteristics

|                                                              | <b>Omicron variant<br/>infection (n=34)</b> | <b>Delta variant<br/>infection (n=32)</b> |
|--------------------------------------------------------------|---------------------------------------------|-------------------------------------------|
| Female, n (%)                                                | 24 (71%)                                    | 21 (66%)                                  |
| Age, mean (SD)                                               | 42 (15)                                     | 40 (16)                                   |
| Vaccination status, n (%)                                    |                                             |                                           |
| Unvaccinated                                                 | 9 (26%)                                     | 7 (22%)                                   |
| Vaccinated                                                   | 13 (38%)                                    | 24 (75%)                                  |
| Boosted                                                      | 12 (35%)                                    | 1 (3%)                                    |
| Days since last vaccination, mean (SD)                       | 143 (119)                                   | 199 (72)                                  |
| Symptomatic infection, n (%)                                 | 34 (100%)                                   | 31 (97%)                                  |
| Nasal swabs collected, n (%)                                 |                                             |                                           |
| 7                                                            | 29 (86%)                                    | 25 (78%)                                  |
| 6                                                            | 4 (12%)                                     | 5 (16%)                                   |
| ≤5                                                           | 1 (3%)                                      | 2 (6%)                                    |
| Days from index PCR to first study<br>specimen (median, IQR) | 2 (2-3)                                     | 3 (2-4)                                   |

198

199 **Table S2.** Demographics of study participants relative to individuals with COVID-19 infection  
 200 reported in the state of Massachusetts (cumulative cases as of 4/21/22).

|                                                | <b>COVID-19 Cases in Massachusetts</b><br>(through 4/21/22)<br>n = 1,598,541 | <b>Study participants</b><br>(n = 66) | <b>Comments</b>                                                                                                                                                                                                                                                                                                                                     |
|------------------------------------------------|------------------------------------------------------------------------------|---------------------------------------|-----------------------------------------------------------------------------------------------------------------------------------------------------------------------------------------------------------------------------------------------------------------------------------------------------------------------------------------------------|
| <b>Age</b>                                     |                                                                              |                                       |                                                                                                                                                                                                                                                                                                                                                     |
| 0-18                                           | 104,044 (31%)                                                                | 0 (0%)                                | Children were not included in the study. The age of participants was similar to the age of adults infected with COVID-19 in the general population, although no participants were 80yo or older.                                                                                                                                                    |
| 19-29                                          | 31,994 (12%)                                                                 | 19 (29%)                              |                                                                                                                                                                                                                                                                                                                                                     |
| 30-39                                          | 30,499 (11%)                                                                 | 15 (23%)                              |                                                                                                                                                                                                                                                                                                                                                     |
| 40-49                                          | 26,553 (10%)                                                                 | 12 (18%)                              |                                                                                                                                                                                                                                                                                                                                                     |
| 50-59                                          | 22,713 (9%)                                                                  | 12 (18%)                              |                                                                                                                                                                                                                                                                                                                                                     |
| 60-69                                          | 17,004 (6%)                                                                  | 4 (6%)                                |                                                                                                                                                                                                                                                                                                                                                     |
| 70-79                                          | 13,976 (5%)                                                                  | 4 (6%)                                |                                                                                                                                                                                                                                                                                                                                                     |
| 80+                                            | 18,691 (7%)                                                                  | 0 (0%)                                |                                                                                                                                                                                                                                                                                                                                                     |
| <b>Sex</b>                                     |                                                                              |                                       |                                                                                                                                                                                                                                                                                                                                                     |
| Male                                           | 809,030 (48%)                                                                | 45 (68%)                              | Women were somewhat over-represented in the study population relative to the percent of COVID-19 cases in women in the general population.                                                                                                                                                                                                          |
| Female                                         | 907,232 (52%)                                                                | 21 (32%)                              |                                                                                                                                                                                                                                                                                                                                                     |
| Transgender                                    | 73 (<1%)                                                                     | 0 (0%)                                |                                                                                                                                                                                                                                                                                                                                                     |
| Unknown sex                                    | 16,821 (<1%)                                                                 | 0 (0%)                                |                                                                                                                                                                                                                                                                                                                                                     |
| <b>Race/Ethnicity</b>                          |                                                                              |                                       |                                                                                                                                                                                                                                                                                                                                                     |
| Asian, non-Hispanic                            | 58,211 (3%)                                                                  | 5 (8%)                                | Individuals self-identifying as Asian, non-Hispanic, Black or African American, and White, non-Hispanic were all somewhat over-represented in the study cohort relative to COVID-19 cases in the general population. Individuals self-identifying as Hispanic were represented in a similar proportion to COVID-19 cases in the general population. |
| Black or African American, non-Hispanic)       | 102,043 (6%)                                                                 | 8 (12%)                               |                                                                                                                                                                                                                                                                                                                                                     |
| White, non-Hispanic                            | 295,740 (17%)                                                                | 38 (58%)                              |                                                                                                                                                                                                                                                                                                                                                     |
| Hispanic                                       | 650,043 (38%)                                                                | 10 (15%)                              |                                                                                                                                                                                                                                                                                                                                                     |
| Other race, non-Hispanic                       | 156,459 (9%)                                                                 | 0 (0%)                                |                                                                                                                                                                                                                                                                                                                                                     |
| American Indian/Alaskan Native, non-Hispanic   | 1591 (<1%)                                                                   | 0 (0%)                                |                                                                                                                                                                                                                                                                                                                                                     |
| Native Hawaiian/Pacific Islander, non-Hispanic | 557 (<1%)                                                                    | 0 (0%)                                |                                                                                                                                                                                                                                                                                                                                                     |
| Unknown, refused or missing                    | 468,512 (27)                                                                 | 4 (6%)                                |                                                                                                                                                                                                                                                                                                                                                     |

201  
 202 State data extracted from the Massachusetts Department of Public Health publicly reported  
 203 data [https://www.mass.gov/info-details/covid-19-response-reporting# covid-19-interactive-](https://www.mass.gov/info-details/covid-19-response-reporting# covid-19-interactive-data-dashboard)  
 204 [data-dashboard](https://www.mass.gov/info-details/covid-19-response-reporting# covid-19-interactive-data-dashboard)-. Age, race, and ethnicity data for the study population was extracted from  
 205 self-reported information in the medical record.

206 **Table S3.** Median time to PCR and culture conversion  
 207

|                                             | Days to confirmed PCR Conversion<br>(median, IQR) | Days to Confirmed Culture<br>Conversion (median, IQR) |
|---------------------------------------------|---------------------------------------------------|-------------------------------------------------------|
| <u>Days from Index PCR</u>                  |                                                   |                                                       |
| Delta                                       | 10 (8-14)                                         | 4 (3-5)                                               |
| Omicron                                     | 11 (8-15)                                         | 5 (3-9)                                               |
| <u>Days from Index PCR or Symptom Onset</u> |                                                   |                                                       |
| Delta                                       | 12 (9-15)                                         | 6 (4-7)                                               |
| Omicron                                     | 13 (11-16)                                        | 8 (5-10)                                              |

208

209 **Table S4.** Cox proportional hazards model of time from first positive PCR test to PCR conversion

| <b>Covariate</b>   | <b>Univariable Models<br/>Hazard Ratio (95%CI)</b> | <b>Multivariable Models<br/>Hazard Ratio (95%CI)</b> |
|--------------------|----------------------------------------------------|------------------------------------------------------|
| Age (10 years)     | 0.98 (0.82, 1.16)                                  | 0.98 (0.82, 1.17)                                    |
| Sex                |                                                    |                                                      |
| Male               | REF                                                | REF                                                  |
| Female             | 1.14 (0.64, 2.04)                                  | 1.03 (0.57, 1.86)                                    |
| Vaccination status |                                                    |                                                      |
| Unvaccinated       | REF                                                | REF                                                  |
| Vaccinated         | 0.52 (0.27, 1.00)                                  | 0.44 (0.22, 0.90)                                    |
| Boosted            | 0.77 (0.35, 1.71)                                  | 0.91 (0.39, 2.14)                                    |
| Variant            |                                                    |                                                      |
| Delta              | REF                                                | REF                                                  |
| Omicron            | 0.86 (0.51, 1.44)                                  | 0.61 (0.33, 1.15)                                    |

210



211 **Table S5.** Cox proportional hazards model of time to culture conversion

| <b>Covariate</b>   | <b>Univariable Models<br/>Hazard Ratio (95%CI)</b> | <b>Multivariable Models<br/>Hazard Ratio (95%CI)</b> |
|--------------------|----------------------------------------------------|------------------------------------------------------|
| Age                | 0.83 (0.70, 0.99)                                  | 0.84 (0.69, 1.02)                                    |
| Sex                |                                                    |                                                      |
| Male               | REF                                                | REF                                                  |
| Female             | 1.24 (0.73, 2.10)                                  | 1.32 (0.75, 2.33)                                    |
| Vaccination status |                                                    |                                                      |
| Unvaccinated       | REF                                                | REF                                                  |
| Vaccinated         | 0.97 (0.54, 1.75)                                  | 1.07 (0.57, 2.00)                                    |
| Boosted            | 0.72 (0.34, 1.55)                                  | 1.01 (0.43, 2.33)                                    |
| Variant            |                                                    |                                                      |
| Delta              | REF                                                | REF                                                  |
| Omicron            | 0.76 (0.46, 1.24)                                  | 0.77 (0.44, 1.37)                                    |

212

213 *Supplementary References*

- 214 1. Boucau J, Chew KW, Choudhary M, et al. Monoclonal antibody treatment drives rapid  
215 culture conversion in SARS-CoV-2 infection. medRxiv 2021:2021.12.25.21268211.  
216
- 217 2. Siedner MJ, Boucau J, Gilbert RF, et al. Duration of viral shedding and culture positivity  
218 with post-vaccination SARS-CoV-2 delta variant infections. JCI Insight 2021.  
219
- 220 3. Palmer S, Wiegand AP, Maldarelli F, et al. New real-time reverse transcriptase-initiated  
221 PCR assay with single-copy sensitivity for human immunodeficiency virus type 1 RNA in  
222 plasma. J Clin Microbiol 2003;41:4531-6.  
223
- 224 4. O'Toole A, Scher E, Underwood A, et al. Assignment of epidemiological lineages in an  
225 emerging pandemic using the pangolin tool. Virus Evol 2021;7:veab064.  
226
